# Supplementary material for: ROS-responsive polymeric micelles with aggregation-induced emission effects for drug delivery and cellular imaging
Source: Royal Society of Chemistry journal article supplement (doi:10.1039/d3nj05245a), 2024-01-01
Supplement: d3nj05245a1.pdf [file d3nj05245a1.pdf]

## Supporting Information

### **ROS-responsive polymeric micelles with aggregation-induced emission effects for drug delivery and cellular imaging**

Xiaoyi Song <sup>a</sup>, Fan Yang <sup>a</sup>, Ruixuan Ji <sup>a</sup>, Bin Yang <sup>b</sup>, Yin Lv <sup>a\*</sup>, Zhong Wei <sup>a\*</sup>

*<sup>a</sup> School of Chemistry and Chemical Engineering/ State Key Laboratory Incubation Base for Green Processing of Chemical Engineering, Shihezi University, Shihezi 832000, China*

*<sup>b</sup> School of Biomedical Engineering, Guangzhou Medical University, Guangzhou 511436, China*

**Table S1** Elemental analysis results of polymers

|           |                 | Element Content (wt.%) <sup>a</sup> |        |
|-----------|-----------------|-------------------------------------|--------|
|           |                 | Carbon                              | Oxygen |
| Polymer-1 | mPEG-PCL        | 58.54                               | 41.46  |
| Polymer-2 | mPEG-TK-PCL     | 60.26                               | 39.74  |
| Polymer-3 | mPEG-TK-PCL-TPE | 57.45                               | 42.55  |

<sup>a</sup> Obtained by elemental analysis.

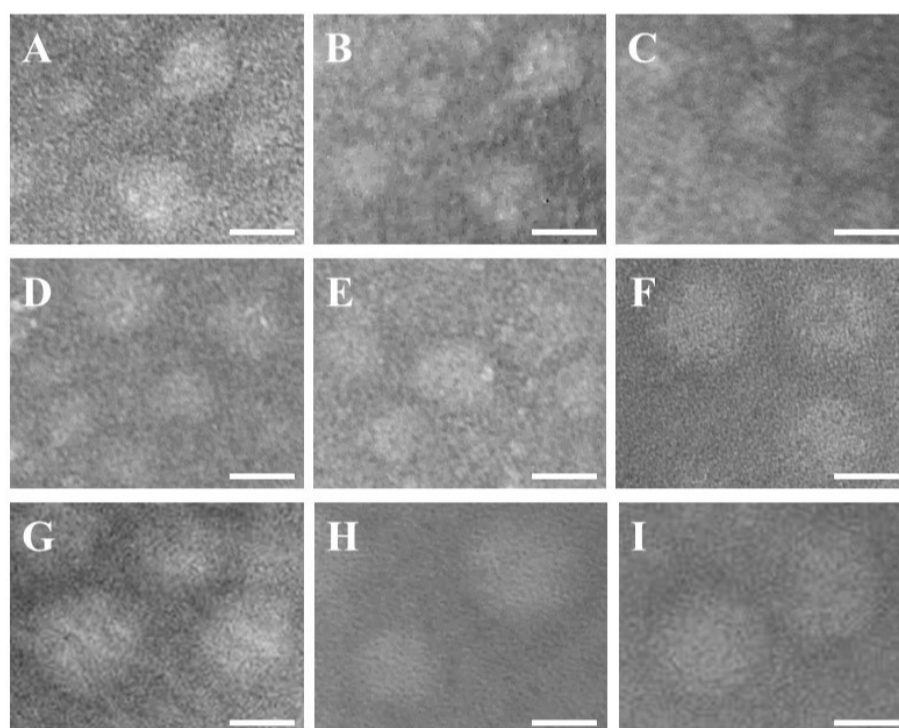

**Figure S1** Transmission electron microscopy (TEM) images of blank polymer micelles in different environments: (A) Polymer-1 (B) Polymer-2 (C) Polymer-3 at pH 7.4; (D) Polymer-1 (E) Polymer-2 (F) Polymer-3 at pH 5.5; (G) Polymer-1 (H) Polymer-2 (I) Polymer-3 at pH 5.5 and 10 mM H<sub>2</sub>O<sub>2</sub> (scale: 50 nm).

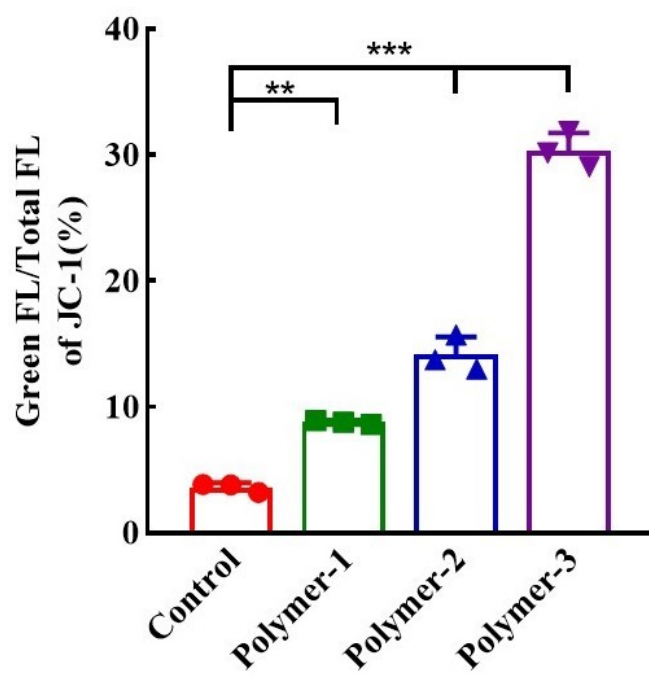

**Figure S2** The quantitative percentage of JC-1 monomer fluorescence to total fluorescence intensity.
